# Supplementary material for: Homoleptic, heteroleptic and mixed-valent thallium and indium complexes of multidentate chalcogen-centred PCP-bridged ligands
Source: Royal Society of Chemistry journal article supplement (doi:10.1039/c1dt10646e), 2011-01-01
Supplement: c1dt10646e.pdf [file c1dt10646e.pdf]

**Supplementary information:**

**Homoleptic, Heteroleptic and Mixed-Valent Thallium and Indium Complexes of  
Multidentate Chalcogen-Centered PCP-Bridged Ligands**

**Maarit Risto, Tristram Chivers\* and Jari Konu**

*Department of Chemistry, University of Calgary, 2500 University Drive N.W., Calgary, AB,  
T2N 1N4, Canada.*

*E-mail: chivers@ucalgary.ca; Fax: +1 403 289 9488; Tel: +1 403 220 5741*

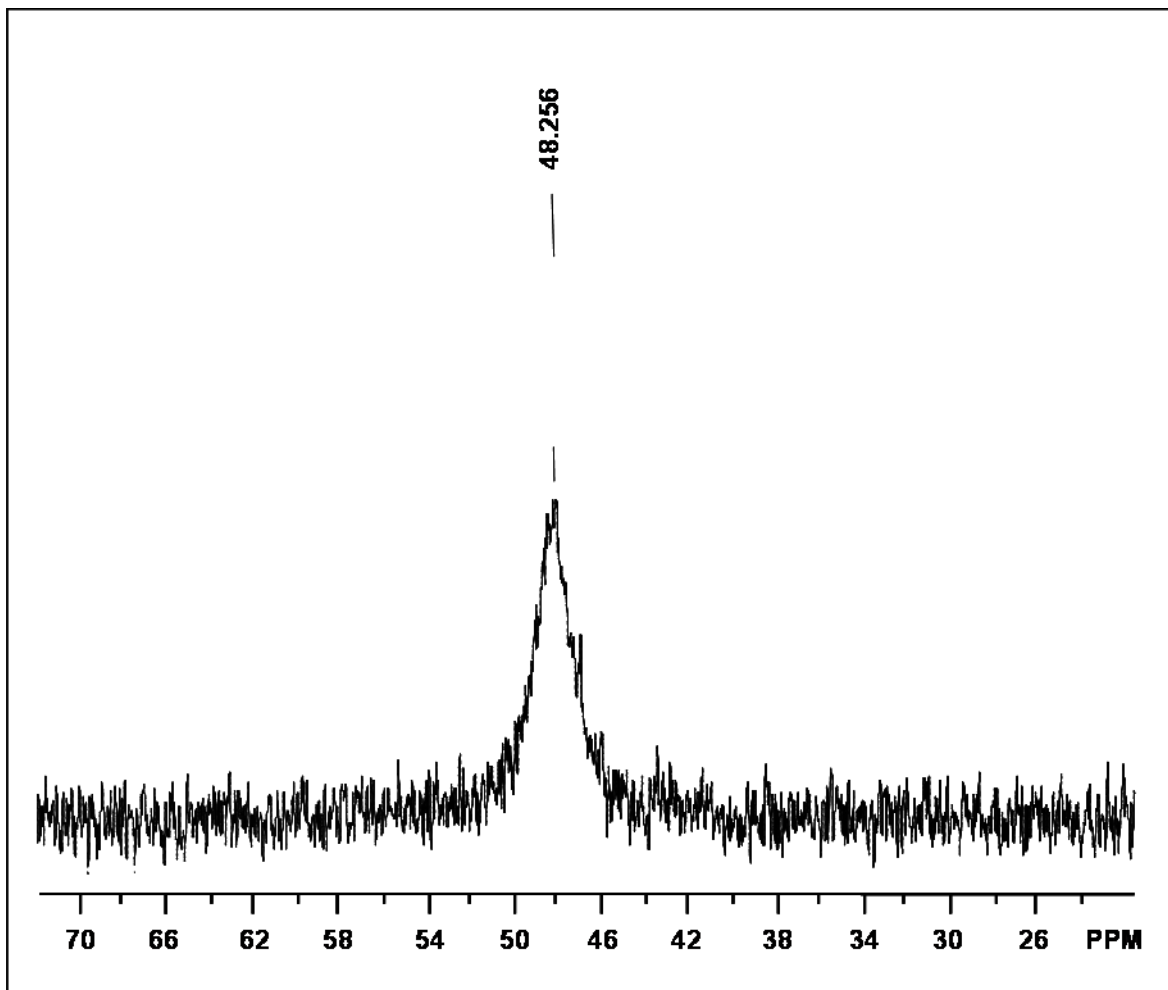

**Figure S1.** The  $^{31}\text{P}\{^1\text{H}\}$  NMR spectrum of  $\text{Tl}_2[(\text{SPh}_2\text{P})_2\text{CSSC}(\text{PPh}_2\text{S})_2]$  (**9b**) recorded in  $\text{CD}_2\text{Cl}_2$  at 23 °C.

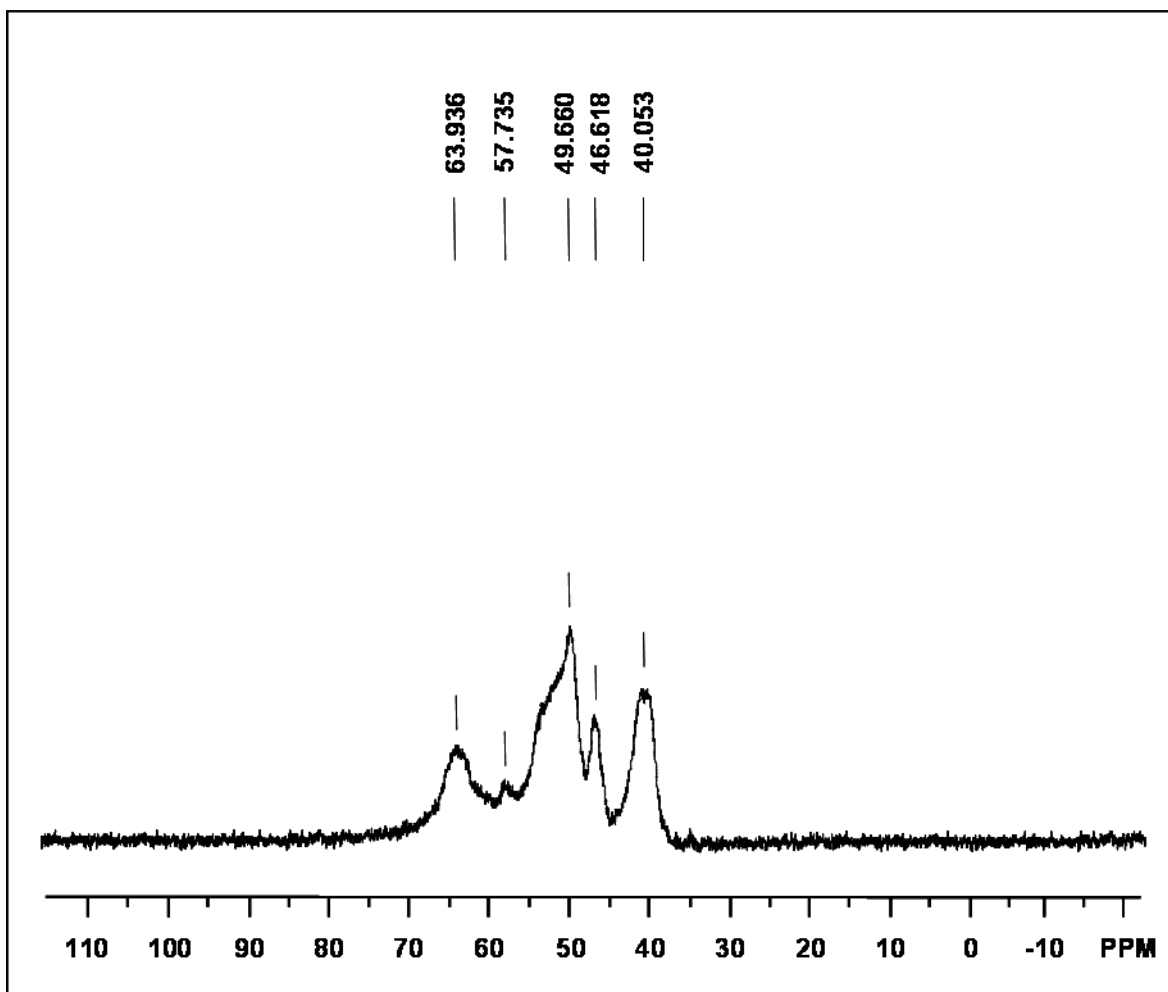

**Figure S2.** The  $^{31}\text{P}\{^1\text{H}\}$  NMR spectrum of  $\text{Tl}_2[(\text{SPh}_2\text{P})_2\text{CSSC}(\text{PPh}_2\text{S})_2]$  (**9b**) recorded in  $\text{CD}_2\text{Cl}_2$  at  $-80\text{ }^\circ\text{C}$ .

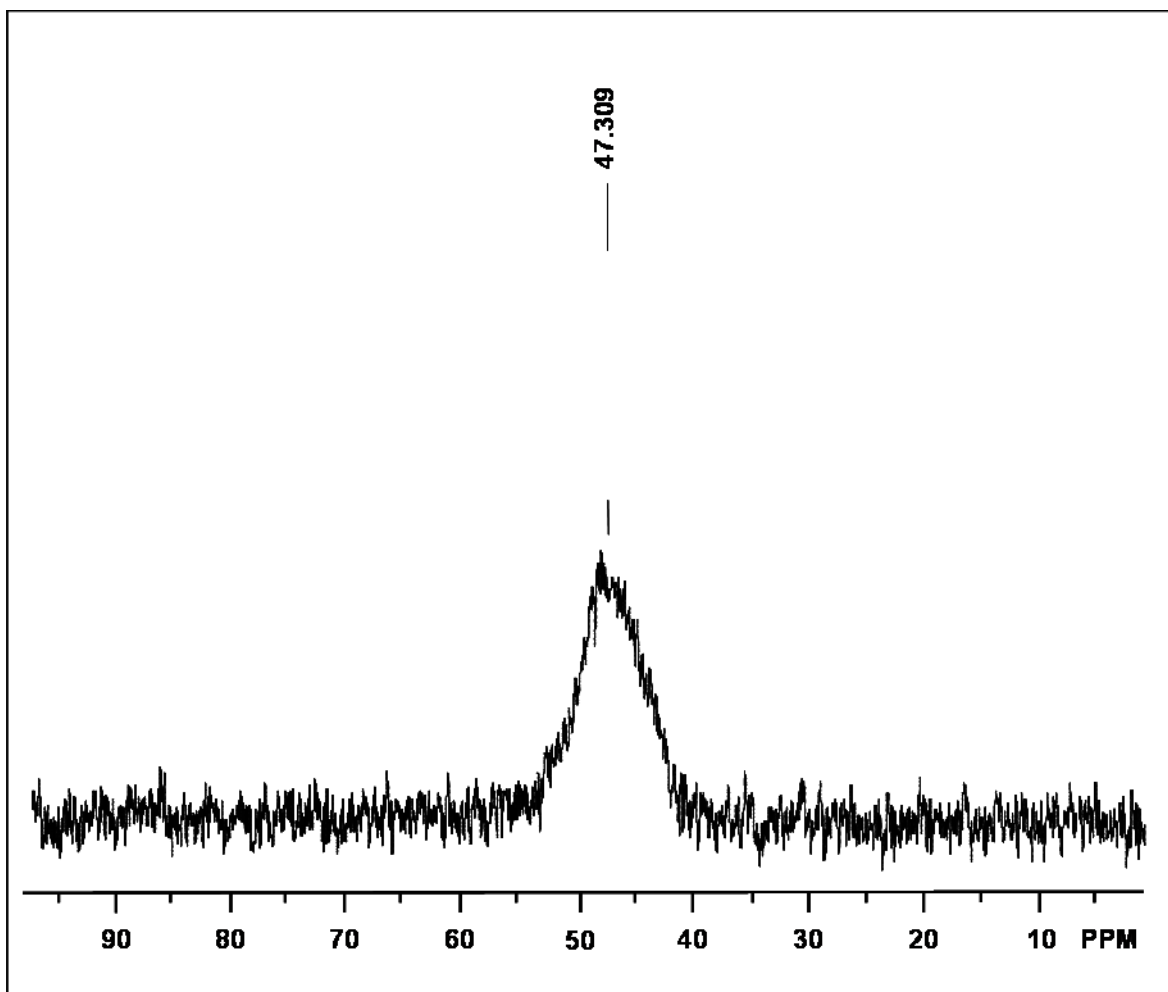

**Figure S3.** The  $^{31}\text{P}\{^1\text{H}\}$  NMR spectrum of  $\text{Tl}_2[(\text{SPh}_2\text{P})_2\text{CSeSeC}(\text{PPh}_2\text{S})_2]$  (**9c**) recorded in  $\text{CD}_2\text{Cl}_2$  at 23 °C.

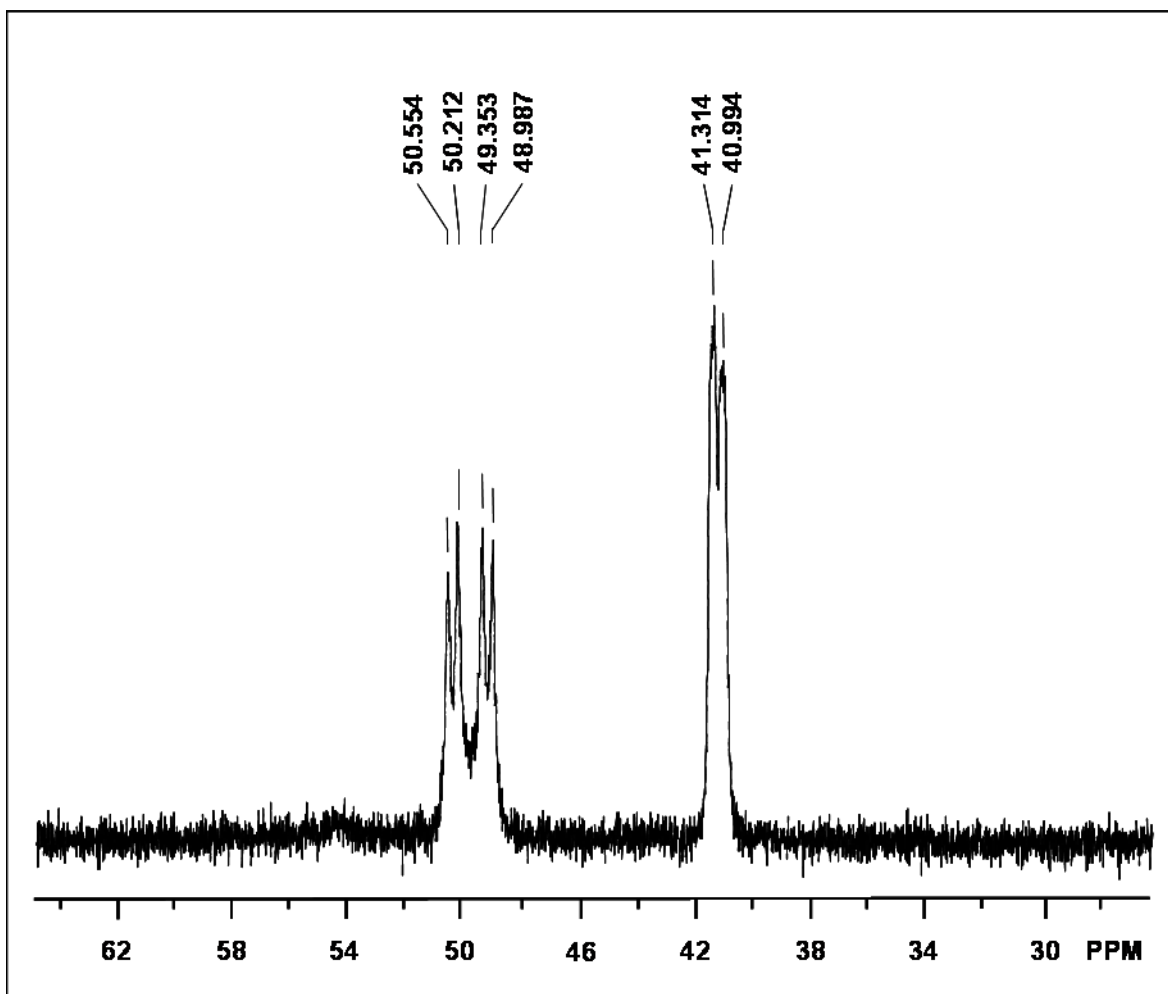

**Figure S4.** The  $^{31}\text{P}\{^1\text{H}\}$  NMR spectrum of  $\text{Tl}_2[(\text{SPh}_2\text{P})_2\text{CSeSeC}(\text{PPh}_2\text{S})_2]$  (**9c**) recorded in  $\text{CD}_2\text{Cl}_2$  at  $-60\text{ }^\circ\text{C}$ .
